# Supplementary material
Source: PubMed Central journal article supplement (PMC3407819)

**Supporting Information:**

- ✚ Table S1. Antibodies used in flow cytometry and definition of T cell subsets.
- ✚ Table S2. Geometric mean and range of multiple cytokine-producing CD4<sup>+</sup> cells.
- ✚ Figure S1. Gating strategies.

**Figure S1. Gating strategies.**

Whole blood cells stimulated with PMA/ionomycin were fixed with 4% paraformaldehyde after lysing the RBCs, and cryopreserved until used. At the time of analysis the cells were thawed and stained with all antibodies in the cocktail (Table S1) except the one that registers in the channel of particular interest [Fluorescence Minus one (FMO) Staining]. The gate drawn for each channel was used to determine the frequency cytokine producing cells in response to antigen stimulation in that channel.

**Table S1**

List of antibodies used in flow cytometry and definition of T helper cell subsets.

| Marker           | Species                                                                                                                                                                                                                                                                                                                                                                                                                                                                                                                                                                                                                                                                               | Clone       | Fluorochrome           | Company       |
|------------------|---------------------------------------------------------------------------------------------------------------------------------------------------------------------------------------------------------------------------------------------------------------------------------------------------------------------------------------------------------------------------------------------------------------------------------------------------------------------------------------------------------------------------------------------------------------------------------------------------------------------------------------------------------------------------------------|-------------|------------------------|---------------|
| CD3              | Mouse                                                                                                                                                                                                                                                                                                                                                                                                                                                                                                                                                                                                                                                                                 | UCHT1       | Alexa Fluor 700        | eBioscience   |
| CD4              | Mouse                                                                                                                                                                                                                                                                                                                                                                                                                                                                                                                                                                                                                                                                                 | RPA-T4      | Alexa Fluor 750/PE-Cy5 | eBioscience   |
| CD8              | Mouse                                                                                                                                                                                                                                                                                                                                                                                                                                                                                                                                                                                                                                                                                 | 3B5         | Qdot605                | Invitrogen    |
| CD25             | Mouse                                                                                                                                                                                                                                                                                                                                                                                                                                                                                                                                                                                                                                                                                 | M-A251      | APC-Cy7                | BD Bioscience |
| CD127            | Mouse                                                                                                                                                                                                                                                                                                                                                                                                                                                                                                                                                                                                                                                                                 | hIL-7R-M21  | PE                     | BD Bioscience |
| CD152            | Mouse                                                                                                                                                                                                                                                                                                                                                                                                                                                                                                                                                                                                                                                                                 | BNI3        | APC                    | BD Bioscience |
| Foxp3            | Rat                                                                                                                                                                                                                                                                                                                                                                                                                                                                                                                                                                                                                                                                                   | PCH101      | Alexa Fluor 488        | eBioscience   |
| IFN- $\gamma$    | Mouse                                                                                                                                                                                                                                                                                                                                                                                                                                                                                                                                                                                                                                                                                 | 4S.B3       | PE-Cy7                 | eBioscience   |
| IL-4             | Rat                                                                                                                                                                                                                                                                                                                                                                                                                                                                                                                                                                                                                                                                                   | MP4-25D2    | FITC                   | eBioscience   |
| IL-5             | Rat                                                                                                                                                                                                                                                                                                                                                                                                                                                                                                                                                                                                                                                                                   | TRFK5       | PE                     | BD Bioscience |
| IL-10            | Rat                                                                                                                                                                                                                                                                                                                                                                                                                                                                                                                                                                                                                                                                                   | JES3-9D7    | APC/Pacific Blue       | eBioscience   |
| IL-17A           | Mouse                                                                                                                                                                                                                                                                                                                                                                                                                                                                                                                                                                                                                                                                                 | eBio64DEC17 | PerCp-Cy5.5            | eBioscience   |
| TNF- $\alpha$    | Mouse                                                                                                                                                                                                                                                                                                                                                                                                                                                                                                                                                                                                                                                                                 | MAb11       | Pacific Blue           | eBioscience   |
| Th1              | CD3 <sup>+</sup> CD4 <sup>+</sup> IFN- $\gamma$ <sup>+</sup> IL-10 <sup>+</sup> TNF- $\alpha$ <sup>+</sup> IL-17A <sup>-</sup> IL-5 <sup>-</sup> IL-4 <sup>-</sup> , CD3 <sup>+</sup> CD4 <sup>+</sup> IFN- $\gamma$ <sup>+</sup> IL-10 <sup>+</sup> TNF- $\alpha$ <sup>-</sup> IL-17A <sup>-</sup> IL-5 <sup>-</sup> IL-4 <sup>-</sup> , and CD3 <sup>+</sup> CD4 <sup>+</sup> IFN- $\gamma$ <sup>+</sup> IL-10 <sup>-</sup> TNF- $\alpha$ <sup>-</sup> IL-17A <sup>-</sup> IL-5 <sup>-</sup> IL-4 <sup>-</sup> ;                                                                                                                                                                    |             |                        |               |
| Th2              | CD3 <sup>+</sup> CD4 <sup>+</sup> IL-4 <sup>+</sup> IL-5 <sup>+</sup> IL-10 <sup>+</sup> IFN- $\gamma$ <sup>-</sup> TNF- $\alpha$ <sup>-</sup> IL-17A <sup>-</sup> , CD3 <sup>+</sup> CD4 <sup>+</sup> IL-4 <sup>+</sup> IL-5 <sup>+</sup> IL-10 <sup>-</sup> IFN- $\gamma$ <sup>-</sup> TNF- $\alpha$ <sup>-</sup> IL-17A <sup>-</sup> , CD3 <sup>+</sup> CD4 <sup>+</sup> IL-4 <sup>+</sup> IL-5 <sup>-</sup> IL-10 <sup>-</sup> IFN- $\gamma$ <sup>-</sup> TNF- $\alpha$ <sup>-</sup> IL-17A <sup>-</sup> , and CD3 <sup>+</sup> CD4 <sup>+</sup> IL-5 <sup>+</sup> IL-4 <sup>-</sup> IL-10 <sup>-</sup> IFN- $\gamma$ <sup>-</sup> TNF- $\alpha$ <sup>-</sup> IL-17A <sup>-</sup> |             |                        |               |
| Th17             | CD3 <sup>+</sup> CD4 <sup>+</sup> IL-17A <sup>+</sup> TNF- $\alpha$ <sup>+</sup> IL-10 <sup>+</sup> IFN- $\gamma$ <sup>-</sup> IL-5 <sup>-</sup> IL-4 <sup>-</sup> , CD3 <sup>+</sup> CD4 <sup>+</sup> IL-17A <sup>+</sup> TNF- $\alpha$ <sup>+</sup> IL-10 <sup>-</sup> IFN- $\gamma$ <sup>-</sup> IL-5 <sup>-</sup> IL-4 <sup>-</sup> , CD3 <sup>+</sup> CD4 <sup>+</sup> IL-17A <sup>+</sup> IL-10 <sup>+</sup> TNF- $\alpha$ <sup>-</sup> IFN- $\gamma$ <sup>-</sup> IL-5 <sup>-</sup> IL-4 <sup>-</sup> , and CD3 <sup>+</sup> CD4 <sup>+</sup> IL-17A <sup>+</sup> TNF- $\alpha$ <sup>-</sup> IL-10 <sup>-</sup> IFN- $\gamma$ <sup>-</sup> IL-5 <sup>-</sup> IL-4 <sup>-</sup> |             |                        |               |
| aTreg/Tr1        | aTreg/Tr1 consisted of CD3 <sup>+</sup> CD4 <sup>+</sup> IL-10 <sup>+</sup> IL-4 <sup>-</sup> IL-5 <sup>-</sup> IFN- $\gamma$ <sup>-</sup> TNF- $\alpha$ <sup>-</sup> IL-17A <sup>-</sup> Foxp3 <sup>+</sup> ;                                                                                                                                                                                                                                                                                                                                                                                                                                                                        |             |                        |               |
| nTreg            | CD3 <sup>+</sup> CD4 <sup>+</sup> CD25 <sup>+</sup> Foxp3 <sup>+</sup> CD127 <sup>-</sup>                                                                                                                                                                                                                                                                                                                                                                                                                                                                                                                                                                                             |             |                        |               |
| “TNF- $\alpha$ ” | CD3 <sup>+</sup> CD4 <sup>+</sup> TNF- $\alpha$ <sup>+</sup> IL-10 <sup>+</sup> IFN- $\gamma$ <sup>-</sup> IL-17A <sup>-</sup> IL-5 <sup>-</sup> IL-4 <sup>-</sup> and CD3 <sup>+</sup> CD4 <sup>+</sup> TNF- $\alpha$ <sup>+</sup> IL-10 <sup>-</sup> IFN- $\gamma$ <sup>-</sup> IL-17A <sup>-</sup> IL-5 <sup>-</sup> IL-4 <sup>-</sup>                                                                                                                                                                                                                                                                                                                                             |             |                        |               |

Flow Cytometry

Cryopreserved fixed whole blood cells were thawed at room temperature and washed twice with 1X PBS and transferred to 96-wells V-bottom costar plates (Corning). The cells were then incubated with 1X Permeabilization buffer (eBioscience) for 15 minutes at room temperature and washed again with 1X Permeabilization buffer. The cells were then blocked for 15 minutes at room temperature then washed again with 1X Permeabilization buffer. The cells were then incubated with antibodies for the effector and regulatory panels for 30 minutes then washed twice with PBS. After washing, the cells were resuspended in 0.2 ml of PBS and transferred to 96-plug micro tubes (Bio-Rad) and acquired on an LSRII (BD Bioscience).

**Table S2**Median and range of multiple cytokine-producing CD4<sup>+</sup> cells

|                                             | <b>Fil-</b>                                                           | <b>Fil+</b>                                                            | <b>P value</b> |
|---------------------------------------------|-----------------------------------------------------------------------|------------------------------------------------------------------------|----------------|
|                                             | <b>GM (Range)</b>                                                     | <b>GM (Range)</b>                                                      |                |
| <b>Lymphocyte count</b>                     | 1.9 x 10 <sup>6</sup> (0.85x10 <sup>6</sup> – 2.5x10 <sup>6</sup> )   | 1.9 x10 <sup>6</sup> (1.2 x 10 <sup>6</sup> – 3.8 10 <sup>6</sup> )    | >0.05          |
| <b>CD4+ count</b>                           | 0.51 x10 <sup>6</sup> (0.7 x10 <sup>5</sup> – 9.2 x 10 <sup>5</sup> ) | 0.46 x10 <sup>5</sup> (0.09 x10 <sup>5</sup> – 1.16 x10 <sup>6</sup> ) | > 0.05         |
| <b>Malaria antigen</b>                      |                                                                       |                                                                        |                |
| CD4 <sup>+</sup> IFN- $\gamma$ <sup>+</sup> | 1767.0 (322.0 – 5023.0)                                               | 481.4 (0.0 – 1631.0)                                                   | 0.0013         |
| CD4 <sup>+</sup> IL-4 <sup>+</sup>          | 715.4 (78.5 – 1794.0)                                                 | 567.3 (19.49 – 5020.0)                                                 | >0.05          |
| CD4 <sup>+</sup> IL-5 <sup>+</sup>          | 5213.0 (113.7 – 72892.0)                                              | 3455.0 (53.82 – 21093.0)                                               | >0.05          |
| CD4 <sup>+</sup> IL-10 <sup>+</sup>         | 884.3 (92.38 – 2929.0)                                                | 226.0 (37.12 – 11239.0)                                                | <b>0.04</b>    |
| CD4 <sup>+</sup> IL-17A <sup>+</sup>        | 1533.0 (437.0 – 6080.0)                                               | 949.1 (12.06 – 4474.0)                                                 | >0.05          |
| CD4 <sup>+</sup> TNF- $\alpha$ <sup>+</sup> | 2064.0 (234.5 – 7458.0)                                               | 1055.0 (48.26 – 4078.0)                                                | 0.03           |
| <b>Staphylococcus aureus enterotoxin B</b>  |                                                                       |                                                                        |                |
| CD4 <sup>+</sup> IFN- $\gamma$ <sup>+</sup> | 7241 (629.3 – 21462.0)                                                | 9187 (17.63 – 14916)                                                   | >0.05          |
| CD4 <sup>+</sup> IL-4 <sup>+</sup>          | 2816.0 (227.4 – 8511.0)                                               | 2725.0 (194.0 – 30680.0)                                               | >0.05          |
| CD4 <sup>+</sup> IL-5 <sup>+</sup>          | 6817.0 (199.0 – 79534.0)                                              | 4810.0 (202.4 – 30371.0)                                               | >0.05          |
| CD4 <sup>+</sup> IL-10 <sup>+</sup>         | 3229.0 (142.1 – 8900.0)                                               | 2185.0 (41.76 – 16259.0)                                               | >0.05          |
| CD4 <sup>+</sup> IL-17A <sup>+</sup>        | 3229.0 (270.0 – 10376.0)                                              | 4079.0 (41.76 – 11130.0)                                               | >0.05          |
| CD4 <sup>+</sup> TNF- $\alpha$ <sup>+</sup> | 13763.0 (682.2 – 26837.0)                                             | 15185.0 (595.6 – 52628.0)                                              | >0.05          |

\* P value adjusted for multiple comparisons.

Note: Bold indicates statistically significant

Figure S1

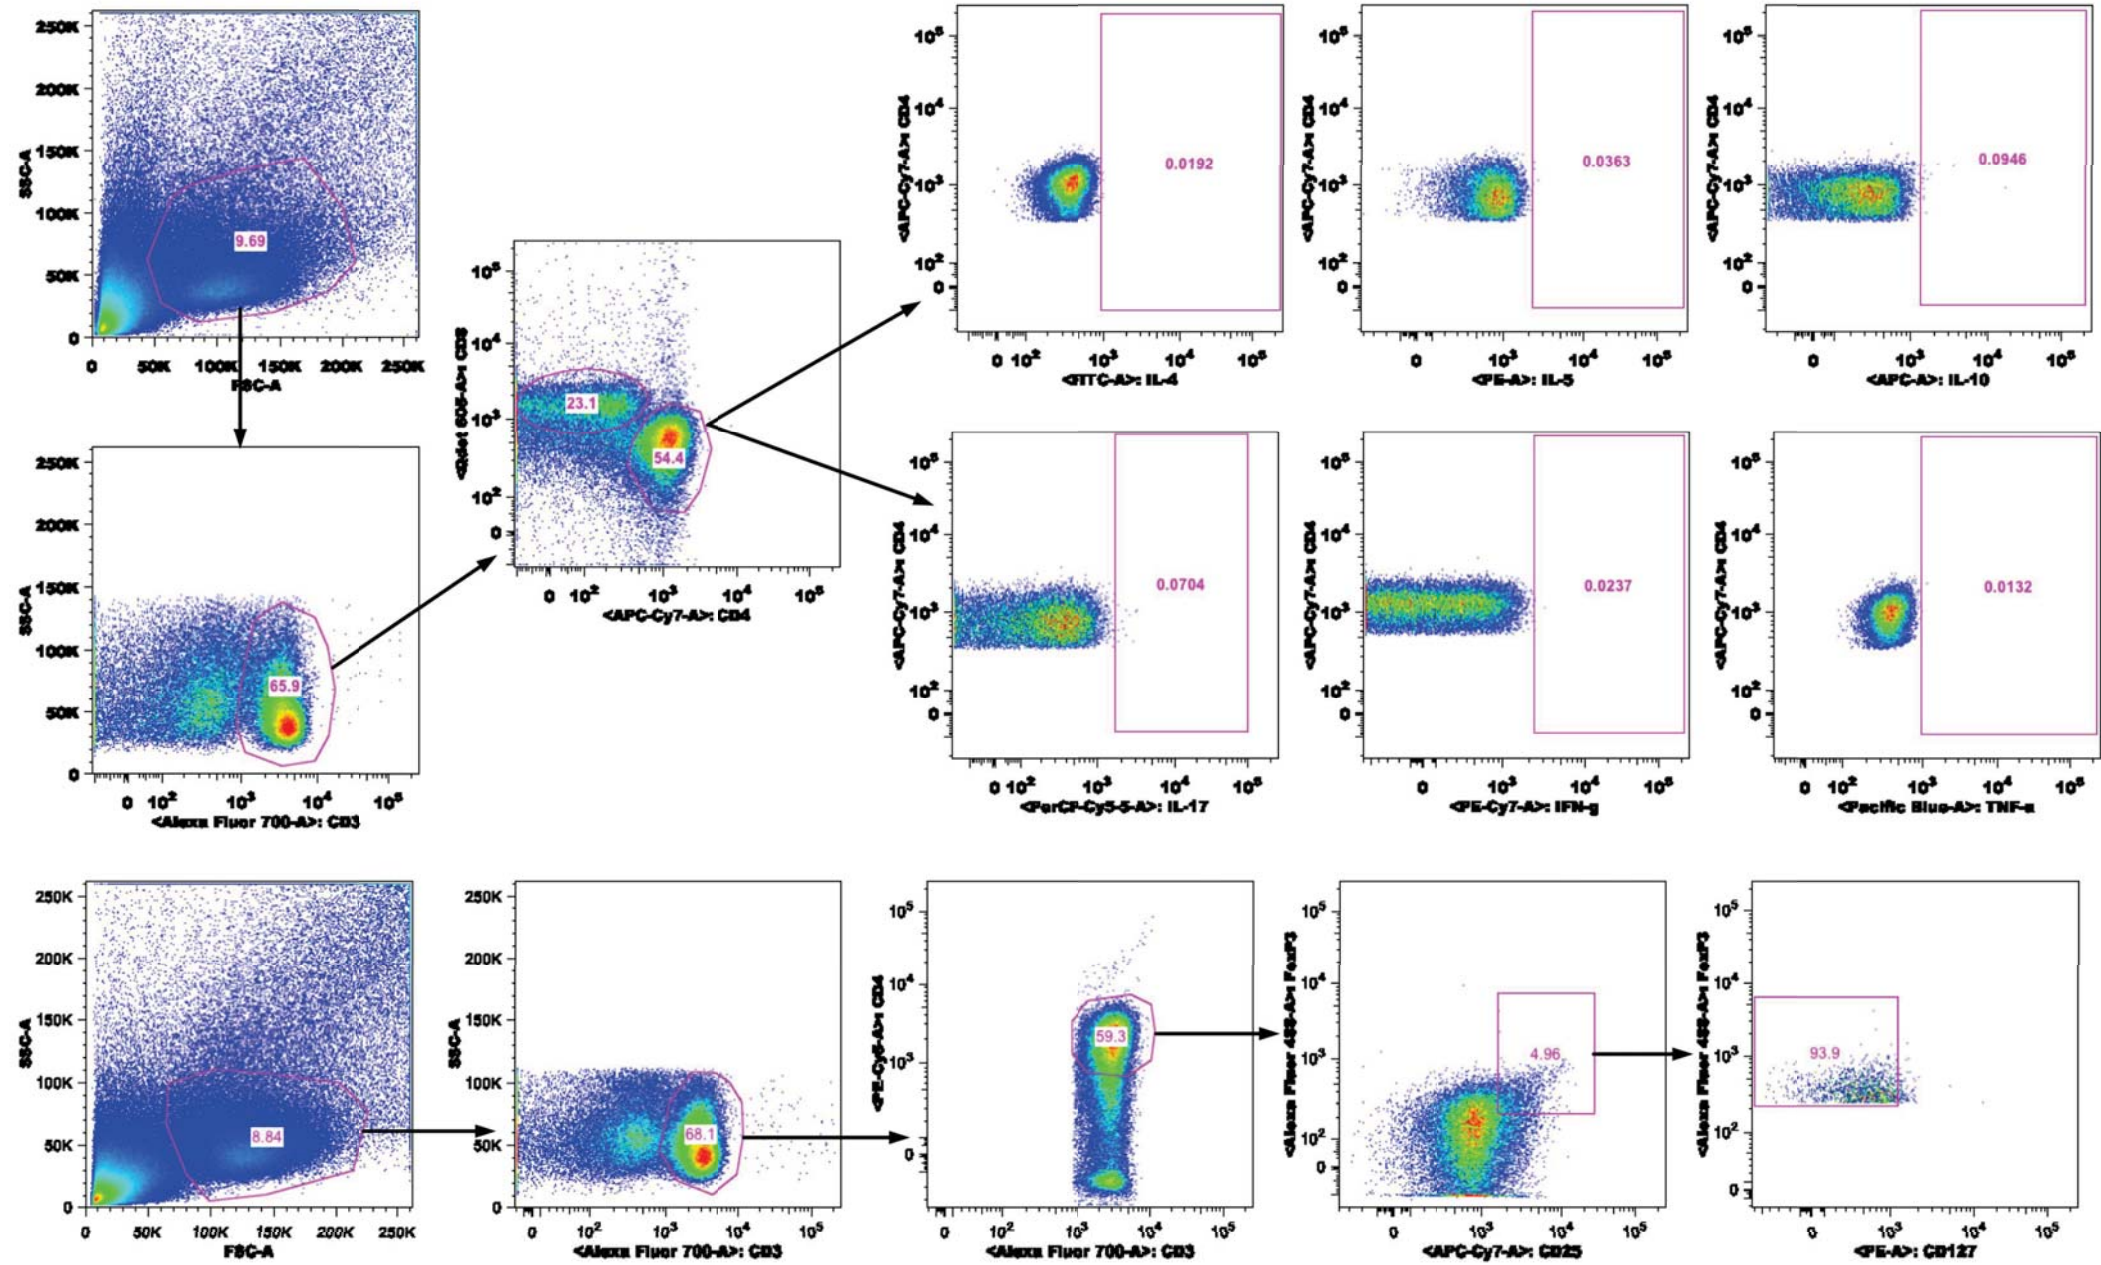

Supplement: NIHMS391079-supplement-01.pdf [file NIHMS391079-supplement-01.pdf]
